# Supplementary material for: Unraveling the Complexities of Groundwater Salinization in Coastal Environments: Insights from Laizhou Bay’s Eastern Coast, China
Source: MDPI journal article supplement (doi:10.3390/w15203629), 2023-10-17
Supplement: s1 [file s1]

**Table S1.** Hydrochemistry and stable isotope compositions of all water samples in the study area.

| No.   | Location                                         | Water type | pH   | Cond. (mS) | Depth (m) | Chemical type | TD S (g/L) | Ag (mg/L) | Al (mg/L) | As (mg/L) | B (mg/L) | Ba (mg/L) | Be (mg/L) | Bi (mg/L) | Ca (mg/L) | Cd (mg/L) | Co (mg/L) | Cr (mg/L) | Cu (mg/L) | Fe (mg/L) | K (mg/L) | Li (mg/L) | Mg (mg/L) | Mn (mg/L) | Mo (mg/L) | Na (mg/L) | Ni (mg/L) | P (mg/L) | Pb (mg/L) | Se (mg/L) | Si (mg/L) | Sn (mg/L) | Sr (mg/L) | Ti (mg/L) | V (mg/L) | Zn (mg/L) | F (mg/L) | Cl (mg/L) | NO <sup>2</sup> (mg/L) | Br (mg/L) | NO <sup>3</sup> (mg/L) | SO <sub>4</sub> (mg/L) | CO <sub>3</sub> (mg/L) | HC O <sub>3</sub> (mg/L) | Ion bal. error (%) | δD <sub>VSMOW</sub> (‰) | δ <sup>18</sup> O <sub>VSMOW</sub> (‰) | δ <sup>37</sup> Cl (‰) |
|-------|--------------------------------------------------|------------|------|------------|-----------|---------------|------------|-----------|-----------|-----------|----------|-----------|-----------|-----------|-----------|-----------|-----------|-----------|-----------|-----------|----------|-----------|-----------|-----------|-----------|-----------|-----------|----------|-----------|-----------|-----------|-----------|-----------|-----------|----------|-----------|----------|-----------|------------------------|-----------|------------------------|------------------------|------------------------|--------------------------|--------------------|-------------------------|----------------------------------------|------------------------|
| B1    | 119°39' 43.4357" 37°03'29.7521" 119°40' 55.4499" | Brine      | 6.84 | 74.00      | 28        | Na-Mg-Cl      | 142.88     | 0.00      | 0.00      | 3.27      | 5.09     | 0.00      | 0.00      | 0.00      | 2334.72   | 0.08      | 0.30      | 0.00      | 0.15      | 0.26      | 1773.84  | 0.23      | 8107.68   | 1.14      | 0.00      | 4253.34   | 0.00      | 0.00     | 0.61      | 3.27      | 12.40     | 0.00      | 14.06     | 0.00      | 8.66     | 1.52      | 13.67    | 482.00    | 0.00                   | 195.90    | 236.40                 | 1179.00                | 0.00                   | 1075.02                  | 5.97               | 33.90                   | -3.30                                  | 0.34                   |
| B2    | 119°46' 35.7693" 37°06'00.5006" 119°46' 35.7693" | Brine      | 6.84 | 85.70      | 30        | Na-Cl         | 123.78     | 0.00      | 0.00      | 0.27      | 6.69     | 0.00      | 0.00      | 0.00      | 1495.68   | 0.08      | 0.30      | 0.00      | 0.08      | 0.23      | 1255.52  | 0.30      | 5543.44   | 4.71      | 0.00      | 3933.00   | 0.00      | 0.00     | 0.23      | 0.84      | 8.27      | 0.00      | 14.59     | 0.00      | 8.82     | 0.68      | 12.46    | 6526.00   | 0.00                   | 60.00     | 92.20                  | 1016.00                | 0.00                   | 578.29                   | 4.90               | 32.60                   | -3.30                                  | 1.08                   |
| B3    | 119°50' 19.2478" 37°09'09.2279" 119°51' 22.6699" | Brine      | 7.77 | 39.10      | 30        | Na-Cl         | 117.79     | 0.00      | 0.00      | 2.43      | 4.28     | 0.05      | 0.00      | 0.00      | 1425.60   | 0.00      | 0.14      | 0.00      | 0.14      | 0.63      | 1412.10  | 0.14      | 3726.00   | 0.45      | 0.00      | 3477.60   | 0.00      | 0.00     | 0.18      | 0.00      | 11.88     | 0.00      | 8.78      | 0.00      | 2.75     | 0.63      | 4.80     | 6605.00   | 24.00                  | 223.50    | 150.95                 | 550.00                 | 0.00                   | 461.52                   | 3.64               | 31.10                   | -2.60                                  | 0.50                   |
| B4    | 119°50' 19.2478" 37°13'18.0137" 119°50' 19.2478" | Brine      | 7.12 | 35.20      | 20        | Na-Cl         | 110.21     | 0.00      | 0.00      | 5.17      | 3.04     | 0.00      | 0.00      | 0.00      | 907.14    | 0.08      | 0.15      | 0.00      | 0.08      | 0.00      | 1529.73  | 0.23      | 3927.68   | 11.10     | 0.23      | 3228.70   | 0.00      | 0.61     | 0.53      | 0.00      | 10.34     | 0.00      | 8.28      | 0.00      | 2.51     | 0.68      | 4.00     | 6108.67   | 0.00                   | 211.37    | 215.90                 | 9576.67                | 0.00                   | 453.73                   | 3.23               | 35.60                   | -3.60                                  | 0.04                   |
| B5    | 119°55' 22.3167" 37°22'04.5985" 119°55' 22.3167" | Brine      | 8.24 | 38.40      | 70        | Na-Cl         | 106.60     | 0.00      | 0.00      | 1.90      | 4.71     | 0.00      | 0.00      | 0.00      | 697.98    | 0.08      | 0.23      | 0.00      | 0.15      | 0.08      | 1829.47  | 0.38      | 3565.92   | 0.00      | 0.15      | 3147.31   | 0.00      | 0.00     | 0.53      | 2.74      | 9.30      | 0.00      | 8.06      | 0.00      | 2.43     | 0.30      | 11.00    | 5933.00   | 0.00                   | 215.90    | 115.26                 | 8896.67                | 0.00                   | 466.34                   | 3.44               | 33.10                   | -3.30                                  | 0.13                   |
| SE A1 | 120°04' 46.5707" 37°22'59.5169"                  | Seawater   | 8.44 | 36.80      |           | Na-Cl         | 35.31      | 0.00      | 0.46      | 1.84      | 3.21     | 0.10      | 0.00      | 0.00      | 424.32    | 0.00      | 0.10      | 0.00      | 0.15      | 7.14      | 446.76   | 0.26      | 1009.80   | 0.56      | 0.10      | 9639.00   | 0.05      | 0.00     | 0.10      | 0.00      | 5.97      | 0.00      | 7.50      | 0.20      | 2.40     | 0.51      | 7.50     | 2045.00   | 0.00                   | 74.07     | 157.00                 | 63000.14               | 5192.76                | 9.11                     | 10.90              | -1.10                   | 0.11                                   |                        |
| SE A2 | 120°04' 46.5707" 37°22'59.5169"                  | Seawater   | 8.93 | 22.20      |           | Na-Cl         | 30.53      | 0.00      | 0.00      | 4.65      | 3.75     | 2.25      | 0.00      | 0.00      | 445.50    | 0.45      | 0.45      | 0.00      | 0.75      | 0.45      | 468.00   | 1.05      | 1053.00   | 1.20      | 0.00      | 8550.00   | 0.30      | 0.00     | 0.00      | 0.00      | 2.85      | 0.00      | 10.35     | 0.15      | 2.85     | 3.30      | 16.00    | 1717.43   | 0.00                   | 62.04     | 154.32                 | 500.36                 | 4181.64                | 4.62                     | -9.20              | -0.80                   | 0.22                                   |                        |







[illegible]
